# Supplementary material
Source: PubMed Central journal article supplement (PMC3009840)
Supplement: NIHMS253235-supplement-1_si_001.pdf [file NIHMS253235-supplement-1_si_001.pdf]

SUPPORTING INFORMATION

## Pyrene-Assisted Efficient Photolysis of Disulfide Bonds in DNA-Based Molecular Engineering

Mingxu You, Zhi Zhu, Haipeng Liu, Basri Gulbakan, Da Han, Ruowen Wang, Kathryn R. Williams and Weihong Tan\*

Department of Chemistry and Department of Physiology and Functional Genomics, Center for Research at the Bio/Nano Interface, Shands Cancer Center, UF Genetics Institute, McKnight Brain Institute, University of Florida, Gainesville, FL 32611-7200, USA

Fax: (+1)352-846-2410

E-mail: tan@chem.ufl.edu

### Figures

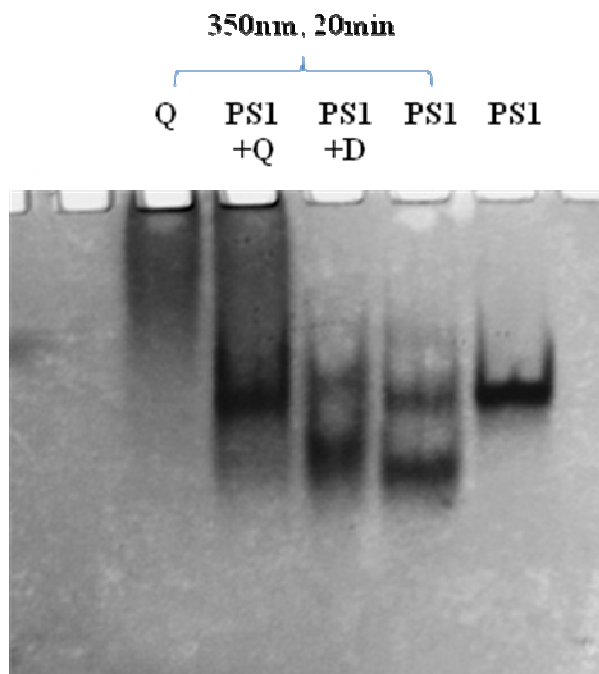

**FIGURE S1.** Radical cleavage mechanism study: Q stands for 1M *p*-benzoquinone, a radical scavenger substrate; D stands for 1M DMSO, an  $\cdot\text{OH}$  radical scavenger. The first 4 solutions

were irradiated simultaneously at 350nm for 20min; the photolysis of disulfides was blocked only by adding *p*-benzoquinone (no fast-moving component).

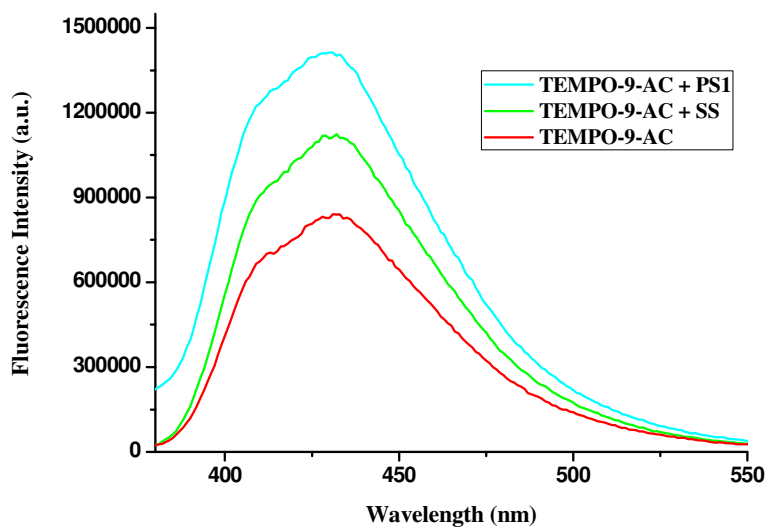

**FIGURE S2.** Radical cleavage mechanism study: radical indicator TEMPO-9-AC (4-((9-acridinecarbonyl) amino)-2, 2, 6, 6-tetramethylpiperidin-1-oxyl, purchased from Invitrogen Co.) can be used to detect hydroxyl radicals, superoxide and thiol radicals. 10  $\mu$ M TEMPO-9-AC was added, followed by irradiation for 15min (0.3W), before fluorescence detection with an excitation wavelength of 361nm.

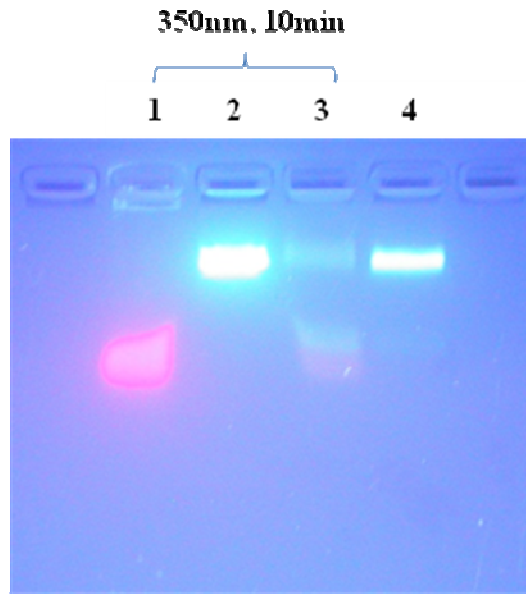

**FIGURE S3.** 4% agarose gel analysis of DNA-micelles: first three samples were irradiated at 350nm for 10min before imaging.

(Lane 1) 5'-**Pyr**-AAAAAAAAATCACAGATGAGT-3': violet monomeric pyrene signal after 350nm irradiation.

(Lane 2) 5'-Lip-**Pyr**-AAAAAAAAATCACAGATGAGT-3': green pyrene aggregate signal after 350nm irradiation.

(Lane 3) 5'-Lip-SS-**Pyr**-AAAAAAAAATCACAGATGAGT-3': After 350nm irradiation, pyrene is present in both monomeric and aggregate forms.

(Lane 4) 5'-Lip-SS-**Pyr**-AAAAAAAAATCACAGATGAGT-3': same as Lane 3 but without 350nm irradiation.

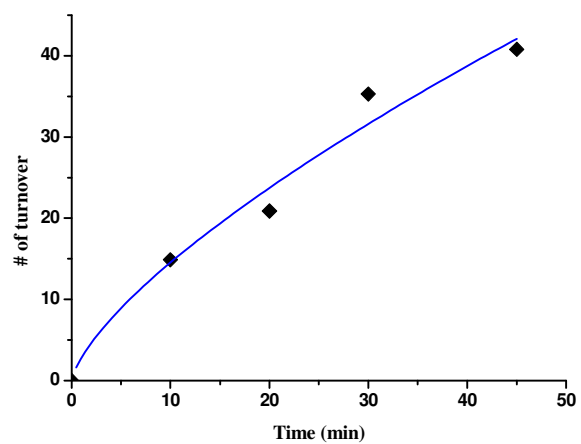

**FIGURE S4.** Catalytic activity of DNAzyme analog: confirmation of multiple turnovers by DNAzyme catalysis of disulfide cleavage with 10  $\mu\text{M}$  substrate DNA shown in **Figure S3**.
